# Supplementary material for: Molecular Ballet: Investigating the Complex Interaction between Self-Assembling Dendrimers and Human Serum Albumin via Computational and Experimental Methods
Source: MDPI journal article supplement (doi:10.3390/pharmaceutics16040533), 2024-04-12
Supplement: s1 [file s1]

# Molecular Ballet: Investigating the Complex Interaction Between Self-Assembling Dendrimers and Human Serum Albumin via Computational and Experimental Methods

Gabriele Cavalieri <sup>1†</sup>, Domenico Marson <sup>1†</sup>, Nicoletta Giurgevich<sup>1</sup>, Rachele Valeri<sup>1</sup>, Fulvia Felluga<sup>2</sup>, Erik Laurini <sup>1,†,\*</sup> and Sabrina Pricl <sup>1,3‡</sup>

<sup>1</sup> Molecular Biology and Nanotechnology Laboratory (MolBNL@UniTS), DEA, University of Trieste, Piazzale Europa 1, 34127 Trieste, Italy

<sup>2</sup> Department of Chemical and Pharmaceutical Sciences, DSCF, University of Trieste, Via Giorgieri 1, Trieste 34127, Italy

<sup>3</sup> Department of General Biophysics, Faculty of Biology and Environmental Protection, University of Lodz, ul. Pomorska 141/143, 90-236 Łódź, Poland

\* Correspondence: [erik.laurini@dia.units.it](mailto:erik.laurini@dia.units.it)

† These authors equally contributed to the manuscript

‡ Senior co-authors

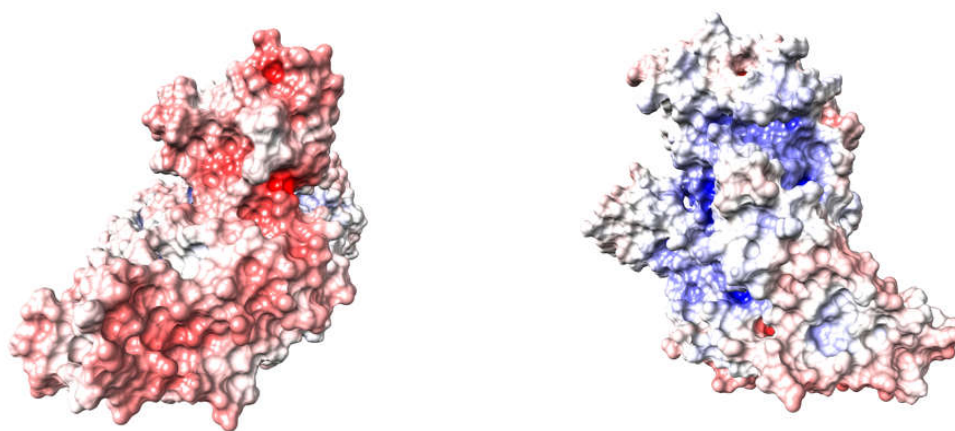

**Figure S1.** Solvent-accessible surface of HSA. HSA molecule is represented by its solvent-accessible surface, colored by the electrostatic potential. Areas predominantly negatively charged and positively charged (left and right panels, respectively) are shown.

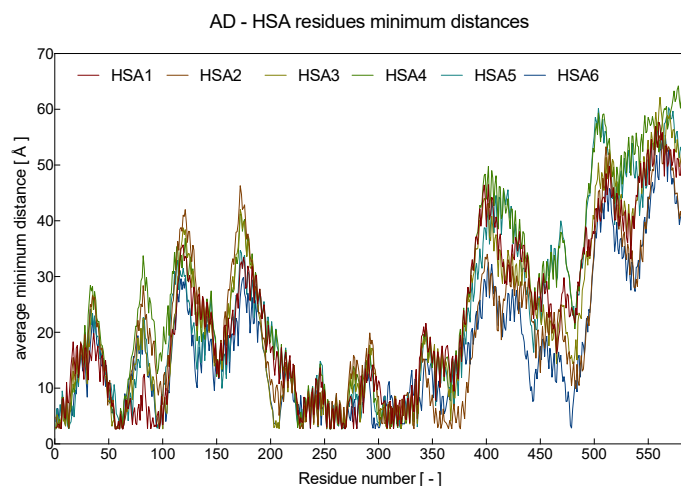

**Figure S2.** Average minimum distances. The average minimum distance between each amino acid of each HSA and the micelle atoms.

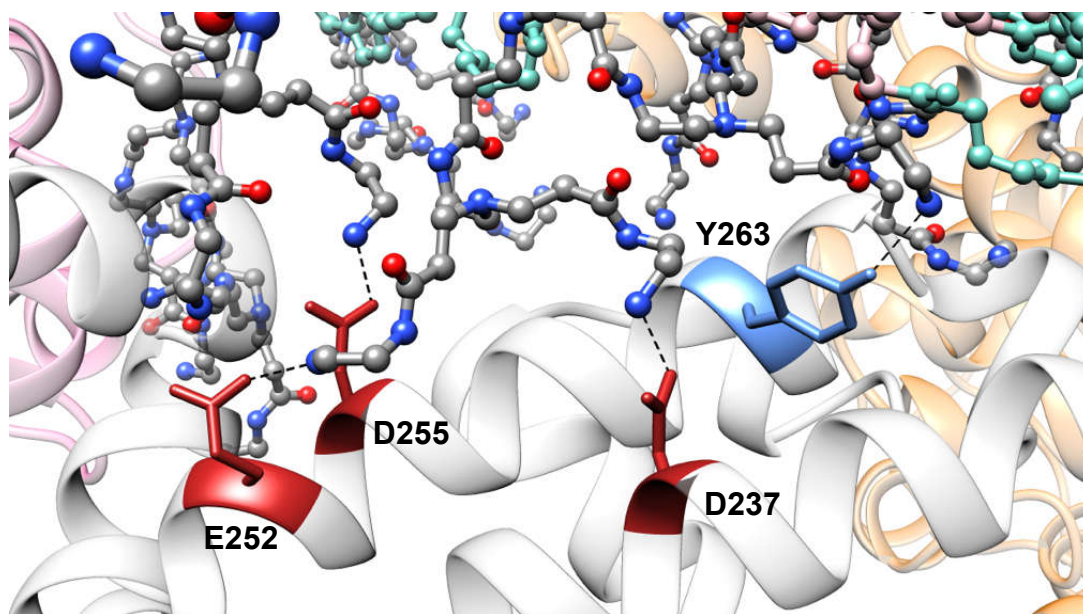

**Figure S3.** Representative interactions between AD and HSA. Salt bridges (SB) and H-bond (HB) are represented by black dotted line. The proteins are shown by colored ribbons while the AD NM is depicted in ball&stick style. The protein residues involved in SB or in HB are labelled and colored in firebrick or in cornflower blue, respectively. The AD head atoms are colored by element while the AD atoms belonging to linker and tail are colored according to the color scheme in Figure 1 of the main text.

**Table S1.** The enthalpic free energy decomposition values, obtained from the MM/PBSA analysis, for each HSA residue. All data are expressed in kcal/mol.

| RESIDUE NUMBER | HSA 1 | HSA 2 | HSA 3 | HSA 4 | HSA 5 | HSA 6 |
|----------------|-------|-------|-------|-------|-------|-------|
| 1              | -0.66 | -0.85 | -1.04 | -1.57 | -1.16 | -0.51 |
| 2              | -2.24 | -0.95 | -0.39 | -1.89 | -0.29 | -0.31 |
| 3              | -2.47 | -3.14 | -1.22 | -2.56 | -2.23 | -0.36 |
| 4              | -4.00 | -2.12 | -2.05 | -1.33 | -1.40 | -1.74 |
| 5              | -1.22 | -1.54 | -0.93 | -0.61 | -0.12 | -0.82 |
| 6              | 0.04  | -0.07 | -0.44 | -0.14 | -0.45 | -0.79 |
| 7              | -0.11 | -0.16 | -0.13 | -0.06 | -0.05 | -0.08 |
| 8              | -0.10 | -0.04 | -0.53 | -0.12 | -0.06 | -0.10 |
| 9              | -0.63 | -0.35 | -1.19 | -1.09 | -0.43 | -1.92 |
| 10             | -0.52 | -0.66 | -1.83 | -1.09 | -0.80 | -2.19 |
| 11             | -0.04 | -0.02 | -0.10 | -0.13 | -0.22 | -0.14 |
| 12             | -0.14 | -0.04 | -0.93 | -1.33 | -2.03 | -0.35 |
| 13             | -0.09 | 0.20  | -1.81 | -1.88 | -1.39 | -0.52 |
| 14             | -0.03 | -0.06 | -0.17 | -0.26 | -0.84 | -0.12 |
| 15             | -0.01 | -0.01 | -0.03 | -0.20 | -0.72 | -0.09 |
| 16             | -0.01 | 0.00  | -0.02 | -0.04 | -0.25 | -0.24 |
| 17             | -0.01 | 0.00  | -0.01 | -0.01 | -0.02 | -0.47 |
| 18             | -0.01 | 0.00  | -0.02 | -0.02 | -0.28 | -0.06 |
| 19             | -0.02 | -0.01 | -0.03 | -0.03 | -0.05 | -0.04 |
| 20             | -0.01 | 0.00  | -0.01 | -0.01 | -0.01 | -0.06 |
| 21             | 0.00  | 0.00  | 0.00  | 0.00  | -0.01 | -0.01 |
| 22             | -0.01 | -0.01 | -0.01 | -0.01 | -0.02 | -0.02 |
| 23             | -0.01 | 0.00  | -0.01 | 0.00  | -0.01 | -0.01 |
| 24             | 0.00  | 0.00  | 0.00  | 0.00  | 0.00  | -0.01 |
| 25             | -0.01 | 0.00  | 0.00  | 0.00  | 0.00  | -0.01 |
| 26             | -0.01 | 0.00  | -0.01 | 0.00  | 0.00  | -0.01 |
| 27             | -0.02 | 0.00  | -0.01 | 0.00  | -0.01 | -0.01 |
| 28             | 0.00  | 0.00  | 0.00  | 0.00  | 0.00  | 0.00  |
| 29             | -0.01 | 0.00  | -0.01 | 0.00  | 0.00  | -0.01 |
| 30             | -0.02 | -0.01 | -0.02 | 0.00  | 0.00  | -0.03 |
| 31             | -0.01 | 0.00  | 0.00  | 0.00  | 0.00  | 0.00  |
| 32             | 0.00  | 0.00  | 0.00  | 0.00  | 0.00  | 0.00  |
| 33             | 0.00  | 0.00  | 0.00  | 0.00  | 0.00  | 0.00  |
| 34             | 0.00  | 0.00  | 0.00  | 0.00  | 0.00  | 0.00  |
| 35             | 0.00  | 0.00  | 0.00  | 0.00  | 0.00  | 0.00  |
| 36             | 0.00  | 0.00  | 0.00  | 0.00  | 0.00  | 0.00  |
| 37             | 0.00  | 0.00  | 0.00  | 0.00  | 0.00  | 0.00  |
| 38             | 0.00  | 0.00  | 0.00  | 0.00  | 0.00  | 0.00  |
| 39             | -0.01 | 0.00  | 0.00  | 0.00  | 0.00  | 0.00  |
| 40             | 0.00  | 0.00  | 0.00  | 0.00  | 0.00  | 0.00  |
| 41             | -0.01 | 0.00  | 0.00  | 0.00  | 0.00  | 0.00  |
| 42             | -0.02 | 0.00  | 0.00  | 0.00  | 0.00  | 0.00  |
| 43             | -0.01 | 0.00  | 0.00  | 0.00  | 0.00  | -0.01 |
| 44             | -0.01 | 0.00  | 0.00  | 0.00  | 0.00  | -0.01 |
| 45             | -0.03 | 0.00  | -0.01 | 0.00  | -0.01 | -0.01 |

|    |       |       |       |       |       |       |
|----|-------|-------|-------|-------|-------|-------|
| 46 | -0.02 | -0.01 | -0.01 | -0.01 | -0.01 | -0.01 |
| 47 | -0.01 | 0.00  | -0.01 | -0.01 | -0.01 | -0.02 |
| 48 | -0.04 | -0.01 | -0.01 | -0.01 | -0.01 | -0.01 |
| 49 | -0.10 | -0.07 | -0.07 | -0.02 | -0.04 | -0.04 |
| 50 | -0.02 | -0.01 | -0.04 | -0.02 | -0.01 | -0.02 |
| 51 | -0.03 | -0.01 | -0.06 | -0.05 | -0.02 | -0.09 |
| 52 | -0.07 | -0.03 | -0.09 | -0.05 | -0.01 | -0.04 |
| 53 | -0.14 | -0.12 | -0.78 | -0.13 | -0.04 | -0.18 |
| 54 | -0.12 | -0.04 | -0.90 | -0.32 | -0.07 | -0.19 |
| 55 | -0.15 | -0.05 | -0.67 | -0.52 | -0.01 | -0.35 |
| 56 | 0.14  | -0.19 | -0.43 | -0.39 | -0.04 | -1.06 |
| 57 | -1.38 | -1.58 | -2.09 | -3.09 | -0.13 | -2.94 |
| 58 | -3.00 | -2.01 | -1.55 | -2.62 | -0.59 | -2.52 |
| 59 | -1.24 | -0.25 | -1.16 | -0.65 | -0.43 | -0.60 |
| 60 | -3.40 | -0.23 | -0.50 | -0.71 | -1.34 | -2.60 |
| 61 | -0.50 | -0.18 | -0.39 | -0.09 | -0.26 | -0.30 |
| 62 | -0.97 | -1.02 | -0.73 | -0.30 | -0.30 | -0.38 |
| 63 | -1.51 | -1.71 | -1.53 | -0.23 | -1.26 | -0.20 |
| 64 | -2.05 | -0.70 | -1.60 | -0.05 | -1.72 | -0.16 |
| 65 | -0.32 | -0.56 | -0.60 | -0.03 | -0.48 | -0.05 |
| 66 | -0.10 | -0.15 | -0.11 | -0.05 | -0.07 | -0.08 |
| 67 | -0.17 | -0.14 | -0.47 | -0.02 | -0.12 | -0.19 |
| 68 | -0.32 | -0.03 | -0.20 | -0.01 | -1.21 | -0.04 |
| 69 | -0.16 | -0.02 | -0.06 | -0.01 | -0.15 | -0.02 |
| 70 | -0.06 | -0.01 | -0.03 | -0.01 | -0.03 | -0.02 |
| 71 | -0.14 | 0.00  | -0.01 | 0.00  | -0.03 | -0.01 |
| 72 | -2.12 | 0.00  | -0.04 | 0.00  | 0.08  | -0.01 |
| 73 | -0.23 | 0.00  | -0.01 | 0.00  | -0.02 | -0.01 |
| 74 | -0.11 | 0.00  | -0.01 | 0.00  | -0.01 | -0.01 |
| 75 | -1.36 | 0.00  | -0.01 | 0.00  | -0.02 | -0.01 |
| 76 | -1.66 | 0.00  | 0.00  | 0.00  | -0.01 | 0.00  |
| 77 | -0.10 | 0.00  | 0.00  | 0.00  | 0.00  | 0.00  |
| 78 | -0.10 | 0.00  | 0.00  | 0.00  | 0.00  | 0.00  |
| 79 | -0.74 | 0.00  | 0.00  | 0.00  | 0.00  | 0.00  |
| 80 | -0.04 | 0.00  | 0.00  | 0.00  | 0.00  | 0.00  |
| 81 | -0.26 | 0.00  | 0.00  | 0.00  | 0.00  | 0.00  |
| 82 | -0.01 | 0.00  | 0.00  | 0.00  | 0.00  | 0.00  |
| 83 | -0.01 | 0.00  | 0.00  | 0.00  | 0.00  | 0.00  |
| 84 | -0.04 | 0.00  | 0.00  | 0.00  | 0.00  | 0.00  |
| 85 | -0.07 | 0.00  | 0.00  | 0.00  | 0.00  | 0.00  |
| 86 | -0.04 | 0.00  | -0.01 | 0.00  | 0.00  | -0.01 |
| 87 | -0.14 | 0.00  | -0.01 | 0.00  | 0.00  | -0.01 |
| 88 | -0.25 | 0.00  | 0.00  | 0.00  | 0.00  | 0.00  |
| 89 | -0.93 | 0.00  | -0.01 | 0.00  | -0.01 | -0.01 |
| 90 | -1.82 | 0.00  | -0.02 | 0.00  | -0.01 | -0.03 |
| 91 | -0.71 | 0.00  | -0.01 | 0.00  | -0.02 | -0.01 |
| 92 | -3.14 | 0.00  | -0.01 | 0.00  | -0.02 | -0.02 |
| 93 | -3.12 | 0.00  | -0.09 | 0.00  | -0.12 | -0.24 |
| 94 | -3.42 | -0.01 | -0.53 | -0.01 | -2.17 | -1.10 |
| 95 | -0.52 | -0.02 | -0.70 | -0.01 | -1.07 | -0.54 |

|     |       |       |       |       |       |       |
|-----|-------|-------|-------|-------|-------|-------|
| 96  | -0.41 | -0.11 | -2.38 | -0.01 | -1.59 | -2.41 |
| 97  | -0.94 | -0.02 | -0.01 | 0.00  | -0.04 | -0.72 |
| 98  | -1.12 | -0.01 | -0.13 | 0.00  | -0.41 | -0.13 |
| 99  | -0.07 | -0.09 | -0.28 | 0.00  | -0.04 | -0.27 |
| 100 | -0.03 | -0.06 | -1.23 | 0.00  | -0.05 | -1.31 |
| 101 | -0.17 | -0.01 | -0.17 | 0.00  | -0.01 | -0.14 |
| 102 | -0.08 | -0.01 | -0.06 | 0.00  | -0.02 | -0.04 |
| 103 | -0.02 | -0.14 | -0.39 | 0.00  | -0.01 | -0.57 |
| 104 | -0.09 | -0.01 | -0.29 | 0.00  | -0.01 | -0.25 |
| 105 | -0.02 | 0.00  | -0.02 | 0.00  | 0.00  | -0.02 |
| 106 | -0.01 | -0.01 | -0.02 | 0.00  | 0.00  | -0.02 |
| 107 | 0.00  | 0.00  | -0.01 | 0.00  | 0.00  | 0.00  |
| 108 | 0.00  | 0.00  | 0.00  | 0.00  | 0.00  | 0.00  |
| 109 | 0.00  | 0.00  | 0.00  | 0.00  | 0.00  | 0.00  |
| 110 | 0.00  | 0.00  | 0.00  | 0.00  | 0.00  | 0.00  |
| 111 | 0.00  | 0.00  | 0.00  | 0.00  | 0.00  | 0.00  |
| 112 | 0.00  | 0.00  | 0.00  | 0.00  | 0.00  | 0.00  |
| 113 | 0.00  | 0.00  | 0.00  | 0.00  | 0.00  | 0.00  |
| 114 | 0.00  | 0.00  | 0.00  | 0.00  | 0.00  | 0.00  |
| 115 | 0.00  | 0.00  | 0.00  | 0.00  | 0.00  | 0.00  |
| 116 | 0.00  | 0.00  | 0.00  | 0.00  | 0.00  | 0.00  |
| 117 | 0.00  | 0.00  | 0.00  | 0.00  | 0.00  | 0.00  |
| 118 | 0.00  | 0.00  | 0.00  | 0.00  | 0.00  | 0.00  |
| 119 | 0.00  | 0.00  | 0.00  | 0.00  | 0.00  | 0.00  |
| 120 | 0.00  | 0.00  | 0.00  | 0.00  | 0.00  | 0.00  |
| 121 | 0.00  | 0.00  | 0.00  | 0.00  | 0.00  | 0.00  |
| 122 | 0.00  | 0.00  | 0.00  | 0.00  | 0.00  | 0.00  |
| 123 | 0.00  | 0.00  | 0.00  | 0.00  | 0.00  | 0.00  |
| 124 | 0.00  | 0.00  | 0.00  | 0.00  | 0.00  | 0.00  |
| 125 | 0.00  | 0.00  | 0.00  | 0.00  | 0.00  | 0.00  |
| 126 | 0.00  | 0.00  | 0.00  | 0.00  | 0.00  | 0.00  |
| 127 | 0.00  | 0.00  | 0.00  | 0.00  | 0.00  | 0.00  |
| 128 | 0.00  | 0.00  | 0.00  | 0.00  | 0.00  | 0.00  |
| 129 | 0.00  | 0.00  | 0.00  | 0.00  | 0.00  | 0.00  |
| 130 | 0.00  | 0.00  | 0.00  | 0.00  | 0.00  | -0.01 |
| 131 | 0.00  | 0.00  | 0.00  | 0.00  | 0.00  | -0.03 |
| 132 | 0.00  | 0.00  | 0.00  | 0.00  | 0.00  | -0.07 |
| 133 | 0.00  | 0.00  | 0.00  | 0.00  | 0.00  | -0.01 |
| 134 | 0.00  | 0.00  | 0.00  | 0.00  | 0.00  | 0.00  |
| 135 | 0.00  | 0.00  | 0.00  | 0.00  | 0.00  | -0.01 |
| 136 | 0.00  | 0.00  | 0.00  | 0.00  | 0.00  | -0.01 |
| 137 | 0.00  | 0.00  | 0.00  | 0.00  | 0.00  | 0.00  |
| 138 | 0.00  | 0.00  | 0.00  | 0.00  | 0.00  | 0.00  |
| 139 | 0.00  | 0.00  | 0.00  | 0.00  | 0.00  | 0.00  |
| 140 | 0.00  | 0.00  | 0.00  | 0.00  | 0.00  | 0.00  |
| 141 | 0.00  | 0.00  | 0.00  | 0.00  | 0.00  | 0.00  |
| 142 | 0.00  | 0.00  | 0.00  | 0.00  | 0.00  | 0.00  |
| 143 | 0.00  | 0.00  | 0.00  | 0.00  | 0.00  | 0.00  |
| 144 | 0.00  | 0.00  | 0.00  | 0.00  | 0.00  | 0.00  |
| 145 | 0.00  | 0.00  | 0.00  | 0.00  | 0.00  | 0.00  |

|     |       |       |       |       |       |       |
|-----|-------|-------|-------|-------|-------|-------|
| 146 | 0.00  | 0.00  | 0.00  | 0.00  | 0.00  | 0.00  |
| 147 | 0.00  | 0.00  | 0.00  | 0.00  | 0.00  | -0.01 |
| 148 | -0.01 | -0.01 | -0.01 | 0.00  | 0.00  | -0.02 |
| 149 | 0.00  | 0.00  | 0.00  | 0.00  | 0.00  | -0.01 |
| 150 | -0.01 | -0.01 | -0.01 | -0.01 | -0.01 | -0.02 |
| 151 | 0.00  | 0.00  | 0.00  | 0.00  | 0.00  | -0.01 |
| 152 | -0.01 | -0.01 | -0.01 | -0.01 | -0.01 | -0.01 |
| 153 | -0.01 | 0.00  | -0.01 | 0.00  | -0.01 | -0.01 |
| 154 | 0.00  | 0.00  | 0.00  | 0.00  | 0.00  | 0.00  |
| 155 | -0.01 | 0.00  | -0.01 | 0.00  | -0.01 | -0.01 |
| 156 | -0.01 | 0.00  | 0.00  | 0.00  | -0.01 | -0.01 |
| 157 | 0.00  | 0.00  | 0.00  | 0.00  | 0.00  | 0.00  |
| 158 | 0.00  | 0.00  | 0.00  | 0.00  | 0.00  | 0.00  |
| 159 | 0.00  | 0.00  | 0.00  | 0.00  | -0.01 | -0.02 |
| 160 | 0.00  | 0.00  | 0.00  | 0.00  | 0.00  | 0.00  |
| 161 | 0.00  | 0.00  | 0.00  | 0.00  | 0.00  | 0.00  |
| 162 | 0.00  | 0.00  | 0.00  | 0.00  | 0.00  | -0.01 |
| 163 | 0.00  | 0.00  | 0.00  | 0.00  | 0.00  | 0.00  |
| 164 | 0.00  | 0.00  | 0.00  | 0.00  | 0.00  | 0.00  |
| 165 | 0.00  | 0.00  | 0.00  | 0.00  | 0.00  | 0.00  |
| 166 | 0.00  | 0.00  | 0.00  | 0.00  | 0.00  | 0.00  |
| 167 | 0.00  | 0.00  | 0.00  | 0.00  | 0.00  | 0.00  |
| 168 | 0.00  | 0.00  | 0.00  | 0.00  | 0.00  | 0.00  |
| 169 | 0.00  | 0.00  | 0.00  | 0.00  | 0.00  | 0.00  |
| 170 | 0.00  | 0.00  | 0.00  | 0.00  | 0.00  | 0.00  |
| 171 | 0.00  | 0.00  | 0.00  | 0.00  | 0.00  | 0.00  |
| 172 | 0.00  | 0.00  | 0.00  | 0.00  | 0.00  | 0.00  |
| 173 | 0.00  | 0.00  | 0.00  | 0.00  | 0.00  | 0.00  |
| 174 | 0.00  | 0.00  | 0.00  | 0.00  | 0.00  | 0.00  |
| 175 | 0.00  | 0.00  | 0.00  | 0.00  | 0.00  | 0.00  |
| 176 | 0.00  | 0.00  | 0.00  | 0.00  | 0.00  | 0.00  |
| 177 | 0.00  | 0.00  | 0.00  | 0.00  | 0.00  | 0.00  |
| 178 | 0.00  | 0.00  | 0.00  | 0.00  | 0.00  | 0.00  |
| 179 | 0.00  | 0.00  | 0.00  | 0.00  | 0.00  | 0.00  |
| 180 | 0.00  | 0.00  | 0.00  | 0.00  | 0.00  | 0.00  |
| 181 | 0.00  | 0.00  | 0.00  | 0.00  | 0.00  | 0.00  |
| 182 | 0.00  | 0.00  | 0.00  | 0.00  | 0.00  | 0.00  |
| 183 | 0.00  | 0.00  | 0.00  | 0.00  | 0.00  | 0.00  |
| 184 | 0.00  | 0.00  | 0.00  | 0.00  | 0.00  | 0.00  |
| 185 | 0.00  | 0.00  | 0.00  | 0.00  | 0.00  | 0.00  |
| 186 | 0.00  | 0.00  | 0.00  | 0.00  | 0.00  | 0.00  |
| 187 | 0.00  | 0.00  | 0.00  | 0.00  | 0.00  | 0.00  |
| 188 | 0.00  | 0.00  | 0.00  | 0.00  | 0.00  | 0.00  |
| 189 | 0.00  | 0.00  | 0.00  | 0.00  | 0.00  | 0.00  |
| 190 | 0.00  | 0.00  | 0.00  | 0.00  | 0.00  | 0.00  |
| 191 | 0.00  | 0.00  | 0.00  | 0.00  | 0.00  | 0.00  |
| 192 | 0.00  | 0.00  | 0.00  | 0.00  | 0.00  | 0.00  |
| 193 | 0.00  | 0.00  | 0.00  | 0.00  | 0.00  | 0.00  |
| 194 | 0.00  | 0.00  | 0.00  | 0.00  | 0.00  | 0.00  |
| 195 | 0.00  | 0.00  | 0.00  | 0.00  | 0.00  | -0.01 |

|     |       |       |       |       |       |       |
|-----|-------|-------|-------|-------|-------|-------|
| 196 | 0.00  | -0.01 | -0.01 | 0.00  | 0.00  | -0.01 |
| 197 | 0.00  | 0.00  | -0.01 | 0.00  | 0.00  | -0.01 |
| 198 | 0.00  | 0.00  | -0.01 | 0.00  | 0.00  | -0.01 |
| 199 | 0.00  | -0.01 | -0.02 | 0.00  | 0.00  | -0.02 |
| 200 | 0.00  | -0.02 | -0.04 | 0.00  | 0.00  | -0.04 |
| 201 | 0.00  | -0.01 | -0.05 | 0.00  | 0.00  | -0.06 |
| 202 | 0.00  | -0.02 | -0.08 | 0.00  | 0.00  | -0.12 |
| 203 | -0.01 | -0.18 | -0.43 | -0.01 | -0.01 | -0.46 |
| 204 | -0.01 | -0.34 | -1.45 | 0.00  | 0.00  | -1.14 |
| 205 | 0.00  | -0.03 | -0.66 | 0.00  | 0.00  | -1.29 |
| 206 | 0.00  | -0.03 | -0.37 | 0.00  | 0.00  | -2.18 |
| 207 | 0.00  | -0.05 | -0.72 | 0.00  | 0.00  | -1.09 |
| 208 | -0.02 | -0.21 | -0.13 | -0.01 | -0.01 | -0.19 |
| 209 | -0.01 | -0.17 | -0.07 | -0.01 | -0.02 | -0.75 |
| 210 | 0.00  | -0.01 | -0.02 | 0.00  | 0.00  | -0.09 |
| 211 | -0.01 | -0.03 | -0.04 | -0.01 | -0.01 | -0.06 |
| 212 | -0.02 | -0.10 | -0.09 | -0.02 | -0.02 | -0.13 |
| 213 | -0.01 | -0.01 | -0.01 | -0.01 | -0.01 | -0.02 |
| 214 | -0.01 | -0.01 | -0.01 | -0.01 | -0.01 | -0.02 |
| 215 | -0.01 | -0.01 | -0.01 | -0.01 | -0.01 | -0.01 |
| 216 | -0.02 | -0.02 | -0.04 | -0.02 | -0.02 | -0.02 |
| 217 | 0.00  | -0.01 | -0.01 | -0.01 | -0.01 | -0.01 |
| 218 | -0.01 | -0.01 | -0.01 | -0.01 | -0.01 | -0.02 |
| 219 | -0.02 | -0.02 | -0.02 | -0.02 | -0.02 | -0.03 |
| 220 | -0.01 | -0.02 | -0.02 | -0.02 | -0.03 | -0.02 |
| 221 | -0.01 | -0.01 | -0.01 | -0.01 | -0.02 | -0.04 |
| 222 | -0.01 | -0.01 | -0.01 | -0.01 | -0.02 | -0.05 |
| 223 | -0.04 | -0.02 | -0.03 | -0.06 | -0.08 | -0.08 |
| 224 | -0.03 | -0.03 | -0.04 | -0.07 | -0.21 | -0.18 |
| 225 | -0.36 | -0.09 | -0.08 | -1.08 | -2.25 | -2.09 |
| 226 | -0.30 | -0.17 | -0.17 | -0.62 | -0.58 | -0.13 |
| 227 | -1.40 | -1.77 | -1.35 | -2.11 | -1.31 | -0.58 |
| 228 | -0.81 | -1.10 | -2.27 | -0.52 | -0.40 | -0.12 |
| 229 | -0.70 | -1.05 | -2.03 | -0.86 | -0.28 | -0.24 |
| 230 | -1.22 | -0.25 | -0.35 | -1.18 | -0.09 | -0.70 |
| 231 | -0.07 | -0.11 | -0.15 | -0.09 | -0.08 | -0.07 |
| 232 | -0.08 | -0.13 | -0.77 | -0.08 | -0.09 | -0.13 |
| 233 | -0.86 | -1.31 | -0.75 | -0.52 | -1.05 | -1.03 |
| 234 | -0.15 | -0.09 | -0.10 | -0.11 | -0.12 | -0.15 |
| 235 | -0.04 | -0.04 | -0.07 | -0.03 | -0.04 | -0.06 |
| 236 | -0.19 | -0.19 | -0.35 | -0.05 | -0.26 | -0.24 |
| 237 | 0.01  | -0.18 | -0.37 | -0.25 | -0.14 | -0.16 |
| 238 | -0.04 | -0.04 | -0.06 | -0.03 | -0.03 | -0.06 |
| 239 | -0.03 | -0.18 | -0.09 | -0.02 | -0.02 | -0.06 |
| 240 | -0.62 | -0.79 | -1.40 | -0.28 | -0.32 | -0.41 |
| 241 | -0.06 | -0.09 | -0.15 | -0.07 | -0.04 | -0.11 |
| 242 | -0.02 | -0.04 | -0.05 | -0.01 | -0.01 | -0.04 |
| 243 | -0.03 | -0.57 | -0.30 | -0.01 | -0.01 | -0.13 |
| 244 | -0.16 | -0.70 | -0.91 | -0.13 | -0.07 | -0.59 |
| 245 | -0.01 | -0.02 | -0.03 | -0.01 | -0.01 | -0.03 |

|     |       |       |       |       |       |       |
|-----|-------|-------|-------|-------|-------|-------|
| 246 | -0.01 | -0.06 | -0.04 | 0.00  | 0.00  | -0.07 |
| 247 | -0.03 | -0.88 | -0.73 | -0.01 | -0.01 | -1.57 |
| 248 | -0.01 | -0.03 | -0.02 | 0.00  | 0.00  | -0.05 |
| 249 | -0.08 | -0.12 | -0.26 | -0.03 | -0.02 | -0.16 |
| 250 | -0.02 | -0.02 | -0.03 | -0.01 | -0.01 | -0.04 |
| 251 | -0.07 | -0.05 | -0.07 | -0.04 | -0.05 | -0.12 |
| 252 | -0.82 | -0.28 | 0.22  | 0.24  | -0.33 | -0.35 |
| 253 | -0.06 | -0.07 | -0.09 | -0.04 | -0.04 | -0.13 |
| 254 | -0.05 | -0.04 | -0.08 | -0.05 | -0.05 | -0.08 |
| 255 | -0.99 | -0.40 | 0.26  | 0.12  | 0.02  | -0.97 |
| 256 | -0.53 | -0.44 | -1.07 | -0.36 | 0.06  | -0.92 |
| 257 | -0.10 | -0.06 | -0.12 | -0.11 | -0.08 | -0.11 |
| 258 | -0.15 | -0.16 | -0.62 | -0.58 | -0.16 | -0.20 |
| 259 | -0.53 | -1.41 | 0.40  | -0.35 | -0.64 | -1.72 |
| 260 | -0.26 | -0.10 | -0.12 | -0.19 | -0.19 | -0.30 |
| 261 | -0.12 | -0.03 | -0.05 | -0.05 | -0.07 | -0.09 |
| 262 | -1.27 | -0.26 | -0.47 | -0.54 | -0.97 | -1.04 |
| 263 | -1.97 | -1.92 | -0.67 | -1.06 | -2.16 | -3.08 |
| 264 | -0.15 | -0.07 | -0.07 | -0.10 | -0.16 | -0.20 |
| 265 | -1.23 | -0.05 | -0.14 | -0.14 | -0.24 | -0.55 |
| 266 | -2.09 | -0.98 | -0.72 | -0.93 | -2.78 | -3.24 |
| 267 | -0.71 | -1.41 | -1.17 | -1.71 | -1.84 | -2.41 |
| 268 | -1.43 | -0.09 | -0.36 | -0.31 | -0.66 | -1.80 |
| 269 | -1.32 | -0.30 | -0.93 | -1.92 | -1.99 | -1.81 |
| 270 | -1.75 | -0.49 | -0.73 | -2.88 | -1.39 | -1.21 |
| 271 | -0.33 | -0.11 | -0.14 | -0.52 | -0.27 | -0.25 |
| 272 | -0.10 | -0.02 | -0.03 | -0.07 | -0.11 | -0.17 |
| 273 | -0.07 | -0.01 | -0.02 | -0.03 | -0.25 | -0.51 |
| 274 | -0.04 | -0.01 | -0.01 | -0.02 | -0.06 | -0.42 |
| 275 | -0.09 | -0.01 | -0.03 | -0.03 | -0.08 | -0.17 |
| 276 | -0.46 | -0.01 | -0.06 | -0.02 | -0.32 | -1.29 |
| 277 | -0.19 | 0.00  | -0.01 | 0.00  | -0.02 | -0.10 |
| 278 | -0.12 | 0.00  | -0.01 | -0.01 | -0.02 | -0.06 |
| 279 | -1.05 | -0.01 | -0.04 | -0.02 | -0.08 | -0.49 |
| 280 | -1.78 | 0.00  | -0.04 | -0.01 | -0.06 | -0.64 |
| 281 | -0.26 | 0.00  | -0.01 | -0.01 | -0.05 | -0.11 |
| 282 | -0.07 | 0.00  | -0.02 | -0.01 | -0.23 | -0.07 |
| 283 | -0.06 | -0.07 | -0.56 | -0.50 | -1.27 | -0.17 |
| 284 | -0.02 | -0.01 | -0.04 | -0.03 | -0.48 | -0.04 |
| 285 | -0.02 | 0.00  | -0.01 | -0.01 | -0.05 | -0.03 |
| 286 | -0.15 | -0.01 | -0.04 | -0.03 | -0.12 | -0.15 |
| 287 | -0.02 | -0.01 | -0.02 | -0.02 | -0.03 | -0.02 |
| 288 | -0.01 | 0.00  | -0.01 | -0.01 | -0.01 | -0.01 |
| 289 | -0.02 | 0.00  | -0.01 | 0.00  | -0.01 | -0.02 |
| 290 | -0.02 | -0.01 | -0.02 | -0.02 | -0.03 | -0.04 |
| 291 | 0.00  | 0.00  | 0.00  | -0.01 | -0.01 | -0.01 |
| 292 | -0.01 | 0.00  | 0.00  | 0.00  | -0.01 | -0.01 |
| 293 | -0.01 | 0.00  | -0.01 | -0.01 | -0.01 | -0.04 |
| 294 | -0.01 | 0.00  | 0.00  | 0.00  | -0.01 | -0.40 |
| 295 | 0.00  | 0.00  | 0.00  | -0.01 | -0.02 | -0.68 |



|     |       |       |       |       |       |       |
|-----|-------|-------|-------|-------|-------|-------|
| 296 | -0.02 | -0.01 | -0.01 | -0.04 | -0.10 | -0.50 |
| 297 | -0.01 | -0.01 | -0.01 | -0.03 | -0.38 | -2.05 |
| 298 | -0.01 | -0.02 | -0.02 | -0.05 | -0.50 | -2.32 |
| 299 | -0.03 | -0.07 | -0.05 | -0.48 | -1.28 | -2.00 |
| 300 | -0.01 | -0.05 | -0.15 | -0.33 | -1.07 | -2.67 |
| 301 | -0.01 | -0.78 | -0.28 | -0.29 | -1.10 | -2.81 |
| 302 | -0.04 | -0.77 | -0.13 | -0.28 | -1.12 | -1.83 |
| 303 | -0.22 | -2.48 | -0.23 | -0.67 | -0.90 | -1.30 |
| 304 | -0.05 | -1.41 | -0.12 | -0.17 | -0.12 | -0.24 |
| 305 | -0.06 | -0.21 | -0.10 | -0.21 | -0.11 | -0.05 |
| 306 | -0.03 | -0.95 | -0.09 | -0.07 | -0.03 | -0.04 |
| 307 | -0.18 | -0.99 | -0.89 | -0.44 | -0.10 | -0.32 |
| 308 | -1.08 | -0.35 | -0.29 | -1.29 | -0.23 | -0.10 |
| 309 | -0.55 | -0.18 | -0.30 | -1.04 | -1.76 | -0.04 |
| 310 | -0.04 | -0.86 | -0.19 | -0.05 | -0.16 | -0.02 |
| 311 | -0.04 | -0.59 | -1.38 | -0.12 | -0.98 | -0.02 |
| 312 | -0.67 | -0.20 | -1.18 | -0.44 | -1.02 | -0.04 |
| 313 | -0.10 | -0.71 | -1.17 | -0.56 | -0.78 | -0.06 |
| 314 | -0.44 | -0.34 | -0.60 | -1.54 | -1.24 | -0.26 |
| 315 | -0.33 | -0.11 | -0.14 | -0.27 | -0.17 | -0.07 |
| 316 | -0.04 | -0.59 | -0.05 | -0.11 | -0.10 | -0.33 |
| 317 | -0.30 | -1.13 | -0.49 | -2.25 | -1.78 | -1.83 |
| 318 | -1.85 | -0.25 | -1.66 | -2.61 | -1.20 | -0.73 |
| 319 | -0.09 | -0.90 | -0.15 | -0.16 | -0.17 | -0.59 |
| 320 | -0.05 | -0.77 | -0.24 | -0.21 | -0.42 | -1.99 |
| 321 | -0.47 | -0.91 | -0.95 | -1.83 | -2.58 | -3.22 |
| 322 | -0.66 | -0.20 | -0.46 | -0.91 | -0.49 | -1.59 |
| 323 | -0.07 | -0.37 | -0.13 | -0.10 | -0.18 | -1.98 |
| 324 | -0.04 | -0.08 | -0.09 | -0.07 | -0.04 | -1.49 |
| 325 | -0.77 | -0.12 | -1.15 | -1.23 | -0.12 | -1.02 |
| 326 | -1.12 | -0.11 | -0.78 | -1.70 | -0.36 | -0.16 |
| 327 | -0.06 | -0.05 | -0.06 | -0.09 | -0.03 | -0.08 |
| 328 | -0.04 | -0.02 | -0.07 | -0.05 | -0.02 | -0.03 |
| 329 | -1.43 | -0.64 | -2.09 | -1.86 | -0.98 | -0.06 |
| 330 | -0.06 | -0.06 | -0.08 | -0.13 | -0.10 | -0.02 |
| 331 | -0.02 | -0.03 | -0.03 | -0.03 | -0.03 | -0.02 |
| 332 | -0.13 | -1.15 | -0.78 | -0.33 | -0.61 | -0.07 |
| 333 | -0.05 | 0.20  | -0.35 | -0.52 | -0.50 | -0.05 |
| 334 | -0.01 | -0.04 | -0.03 | -0.03 | -0.04 | -0.02 |
| 335 | -0.01 | -0.01 | -0.01 | -0.01 | -0.02 | -0.02 |
| 336 | -0.11 | -0.48 | -0.84 | -0.30 | -0.65 | -0.29 |
| 337 | -0.05 | -0.10 | -0.07 | -0.17 | -0.18 | -0.17 |
| 338 | 0.00  | -0.01 | -0.01 | -0.01 | -0.02 | -0.11 |
| 339 | 0.00  | -0.01 | -0.01 | -0.01 | -0.02 | -0.14 |
| 340 | 0.00  | 0.00  | 0.00  | 0.00  | -0.01 | -0.20 |
| 341 | 0.00  | -0.01 | 0.00  | 0.00  | -0.01 | -0.04 |
| 342 | 0.00  | 0.00  | 0.00  | 0.00  | 0.00  | -0.01 |
| 343 | 0.00  | 0.00  | 0.00  | 0.00  | 0.00  | -0.01 |
| 344 | 0.00  | -0.01 | 0.00  | 0.00  | 0.00  | -0.01 |
| 345 | 0.00  | -0.01 | 0.00  | 0.00  | 0.00  | -0.01 |

|     |       |       |       |       |       |       |
|-----|-------|-------|-------|-------|-------|-------|
| 346 | 0.00  | -0.01 | -0.01 | -0.01 | -0.01 | -0.01 |
| 347 | 0.00  | -0.02 | -0.01 | 0.00  | 0.00  | -0.01 |
| 348 | 0.00  | -0.08 | 0.00  | 0.00  | 0.00  | -0.01 |
| 349 | 0.00  | -0.06 | 0.00  | 0.00  | -0.01 | -0.01 |
| 350 | 0.00  | -0.03 | -0.01 | -0.01 | 0.00  | -0.01 |
| 351 | 0.00  | -0.22 | -0.01 | 0.00  | 0.00  | -0.10 |
| 352 | 0.00  | -1.26 | 0.00  | 0.00  | 0.00  | -0.01 |
| 353 | -0.03 | -0.19 | -0.03 | -0.04 | -0.05 | -0.03 |
| 354 | -0.01 | -0.39 | -0.01 | -0.01 | -0.01 | -0.19 |
| 355 | 0.00  | -2.36 | 0.00  | 0.00  | 0.00  | -0.12 |
| 356 | 0.00  | -2.20 | -0.01 | 0.00  | -0.01 | -0.02 |
| 357 | -0.02 | -0.33 | -0.02 | -0.03 | -0.02 | -0.06 |
| 358 | 0.00  | -3.43 | -0.01 | -0.01 | -0.01 | -0.16 |
| 359 | 0.00  | -2.44 | 0.00  | 0.00  | 0.00  | -0.07 |
| 360 | 0.00  | -0.28 | -0.01 | -0.01 | -0.01 | -0.04 |
| 361 | -0.01 | -1.27 | -0.01 | -0.01 | -0.02 | -0.35 |
| 362 | 0.00  | -1.41 | 0.00  | 0.00  | 0.00  | -0.42 |
| 363 | 0.00  | -0.58 | 0.00  | 0.00  | -0.01 | -0.16 |
| 364 | 0.00  | -1.42 | -0.01 | 0.00  | -0.01 | -0.20 |
| 365 | 0.00  | -1.87 | -0.04 | 0.00  | -0.02 | -0.05 |
| 366 | 0.00  | -0.90 | -0.02 | -0.01 | -0.02 | -0.17 |
| 367 | -0.01 | -1.74 | -0.69 | -0.03 | -0.08 | -0.02 |
| 368 | 0.00  | -0.28 | -0.06 | 0.00  | -0.01 | -0.01 |
| 369 | 0.00  | -0.26 | -0.01 | 0.00  | 0.00  | -0.01 |
| 370 | -0.02 | -0.22 | -0.06 | -0.03 | -0.05 | -0.03 |
| 371 | 0.00  | -0.29 | -0.07 | 0.00  | -0.01 | 0.00  |
| 372 | 0.00  | -1.37 | -0.01 | 0.00  | 0.00  | 0.00  |
| 373 | 0.00  | -0.58 | -0.01 | 0.00  | -0.01 | -0.01 |
| 374 | -0.01 | -0.16 | -0.02 | -0.01 | -0.03 | -0.01 |
| 375 | 0.00  | -0.03 | 0.00  | 0.00  | 0.00  | 0.00  |
| 376 | 0.00  | -1.11 | 0.00  | 0.00  | 0.00  | 0.00  |
| 377 | 0.00  | -0.18 | -0.01 | 0.00  | -0.01 | -0.01 |
| 378 | 0.00  | -0.06 | 0.00  | 0.00  | 0.00  | 0.00  |
| 379 | 0.00  | -0.20 | 0.00  | 0.00  | 0.00  | 0.00  |
| 380 | 0.00  | -0.48 | 0.00  | 0.00  | 0.00  | 0.00  |
| 381 | 0.00  | -0.01 | 0.00  | 0.00  | 0.00  | -0.01 |
| 382 | 0.00  | -0.01 | 0.00  | 0.00  | 0.00  | 0.00  |
| 383 | 0.00  | -0.02 | 0.00  | 0.00  | 0.00  | 0.00  |
| 384 | 0.00  | 0.00  | 0.00  | 0.00  | 0.00  | 0.00  |
| 385 | 0.00  | 0.00  | 0.00  | 0.00  | 0.00  | 0.00  |
| 386 | 0.00  | 0.00  | 0.00  | 0.00  | 0.00  | 0.00  |
| 387 | 0.00  | 0.00  | 0.00  | 0.00  | 0.00  | 0.00  |
| 388 | 0.00  | 0.00  | 0.00  | 0.00  | 0.00  | 0.00  |
| 389 | 0.00  | 0.00  | 0.00  | 0.00  | 0.00  | 0.00  |
| 390 | 0.00  | 0.00  | 0.00  | 0.00  | 0.00  | 0.00  |
| 391 | 0.00  | 0.00  | 0.00  | 0.00  | 0.00  | 0.00  |
| 392 | 0.00  | 0.00  | 0.00  | 0.00  | 0.00  | 0.00  |
| 393 | 0.00  | 0.00  | 0.00  | 0.00  | 0.00  | 0.00  |
| 394 | 0.00  | 0.00  | 0.00  | 0.00  | 0.00  | 0.00  |
| 395 | 0.00  | 0.00  | 0.00  | 0.00  | 0.00  | 0.00  |

|     |      |      |      |      |      |       |
|-----|------|------|------|------|------|-------|
| 396 | 0.00 | 0.00 | 0.00 | 0.00 | 0.00 | 0.00  |
| 397 | 0.00 | 0.00 | 0.00 | 0.00 | 0.00 | 0.00  |
| 398 | 0.00 | 0.00 | 0.00 | 0.00 | 0.00 | 0.00  |
| 399 | 0.00 | 0.00 | 0.00 | 0.00 | 0.00 | 0.00  |
| 400 | 0.00 | 0.00 | 0.00 | 0.00 | 0.00 | 0.00  |
| 401 | 0.00 | 0.00 | 0.00 | 0.00 | 0.00 | 0.00  |
| 402 | 0.00 | 0.00 | 0.00 | 0.00 | 0.00 | 0.00  |
| 403 | 0.00 | 0.00 | 0.00 | 0.00 | 0.00 | 0.00  |
| 404 | 0.00 | 0.00 | 0.00 | 0.00 | 0.00 | 0.00  |
| 405 | 0.00 | 0.00 | 0.00 | 0.00 | 0.00 | 0.00  |
| 406 | 0.00 | 0.00 | 0.00 | 0.00 | 0.00 | 0.00  |
| 407 | 0.00 | 0.00 | 0.00 | 0.00 | 0.00 | 0.00  |
| 408 | 0.00 | 0.00 | 0.00 | 0.00 | 0.00 | 0.00  |
| 409 | 0.00 | 0.00 | 0.00 | 0.00 | 0.00 | 0.00  |
| 410 | 0.00 | 0.00 | 0.00 | 0.00 | 0.00 | 0.00  |
| 411 | 0.00 | 0.00 | 0.00 | 0.00 | 0.00 | 0.00  |
| 412 | 0.00 | 0.00 | 0.00 | 0.00 | 0.00 | 0.00  |
| 413 | 0.00 | 0.00 | 0.00 | 0.00 | 0.00 | 0.00  |
| 414 | 0.00 | 0.00 | 0.00 | 0.00 | 0.00 | 0.00  |
| 415 | 0.00 | 0.00 | 0.00 | 0.00 | 0.00 | 0.00  |
| 416 | 0.00 | 0.00 | 0.00 | 0.00 | 0.00 | 0.00  |
| 417 | 0.00 | 0.00 | 0.00 | 0.00 | 0.00 | 0.00  |
| 418 | 0.00 | 0.00 | 0.00 | 0.00 | 0.00 | 0.00  |
| 419 | 0.00 | 0.00 | 0.00 | 0.00 | 0.00 | 0.00  |
| 420 | 0.00 | 0.00 | 0.00 | 0.00 | 0.00 | 0.00  |
| 421 | 0.00 | 0.00 | 0.00 | 0.00 | 0.00 | 0.00  |
| 422 | 0.00 | 0.00 | 0.00 | 0.00 | 0.00 | 0.00  |
| 423 | 0.00 | 0.00 | 0.00 | 0.00 | 0.00 | 0.00  |
| 424 | 0.00 | 0.00 | 0.00 | 0.00 | 0.00 | 0.00  |
| 425 | 0.00 | 0.00 | 0.00 | 0.00 | 0.00 | 0.00  |
| 426 | 0.00 | 0.00 | 0.00 | 0.00 | 0.00 | 0.00  |
| 427 | 0.00 | 0.00 | 0.00 | 0.00 | 0.00 | 0.00  |
| 428 | 0.00 | 0.00 | 0.00 | 0.00 | 0.00 | 0.00  |
| 429 | 0.00 | 0.00 | 0.00 | 0.00 | 0.00 | 0.00  |
| 430 | 0.00 | 0.00 | 0.00 | 0.00 | 0.00 | 0.00  |
| 431 | 0.00 | 0.00 | 0.00 | 0.00 | 0.00 | 0.00  |
| 432 | 0.00 | 0.00 | 0.00 | 0.00 | 0.00 | 0.00  |
| 433 | 0.00 | 0.00 | 0.00 | 0.00 | 0.00 | 0.00  |
| 434 | 0.00 | 0.00 | 0.00 | 0.00 | 0.00 | 0.00  |
| 435 | 0.00 | 0.00 | 0.00 | 0.00 | 0.00 | 0.00  |
| 436 | 0.00 | 0.00 | 0.00 | 0.00 | 0.00 | 0.00  |
| 437 | 0.00 | 0.00 | 0.00 | 0.00 | 0.00 | 0.00  |
| 438 | 0.00 | 0.00 | 0.00 | 0.00 | 0.00 | 0.00  |
| 439 | 0.00 | 0.00 | 0.00 | 0.00 | 0.00 | 0.00  |
| 440 | 0.00 | 0.00 | 0.00 | 0.00 | 0.00 | -0.01 |
| 441 | 0.00 | 0.00 | 0.00 | 0.00 | 0.00 | -0.04 |
| 442 | 0.00 | 0.00 | 0.00 | 0.00 | 0.00 | 0.00  |
| 443 | 0.00 | 0.00 | 0.00 | 0.00 | 0.00 | -0.12 |
| 444 | 0.00 | 0.00 | 0.00 | 0.00 | 0.00 | -0.07 |
| 445 | 0.00 | 0.00 | 0.00 | 0.00 | 0.00 | -0.01 |

|     |      |       |      |      |      |       |
|-----|------|-------|------|------|------|-------|
| 446 | 0.00 | 0.00  | 0.00 | 0.00 | 0.00 | -0.01 |
| 447 | 0.00 | 0.00  | 0.00 | 0.00 | 0.00 | -0.01 |
| 448 | 0.00 | 0.00  | 0.00 | 0.00 | 0.00 | 0.00  |
| 449 | 0.00 | 0.00  | 0.00 | 0.00 | 0.00 | 0.00  |
| 450 | 0.00 | 0.00  | 0.00 | 0.00 | 0.00 | 0.00  |
| 451 | 0.00 | 0.00  | 0.00 | 0.00 | 0.00 | 0.00  |
| 452 | 0.00 | 0.00  | 0.00 | 0.00 | 0.00 | 0.00  |
| 453 | 0.00 | 0.00  | 0.00 | 0.00 | 0.00 | 0.00  |
| 454 | 0.00 | 0.00  | 0.00 | 0.00 | 0.00 | 0.00  |
| 455 | 0.00 | 0.00  | 0.00 | 0.00 | 0.00 | 0.00  |
| 456 | 0.00 | 0.00  | 0.00 | 0.00 | 0.00 | 0.00  |
| 457 | 0.00 | 0.00  | 0.00 | 0.00 | 0.00 | 0.00  |
| 458 | 0.00 | 0.00  | 0.00 | 0.00 | 0.00 | 0.00  |
| 459 | 0.00 | 0.00  | 0.00 | 0.00 | 0.00 | 0.00  |
| 460 | 0.00 | 0.00  | 0.00 | 0.00 | 0.00 | 0.00  |
| 461 | 0.00 | 0.00  | 0.00 | 0.00 | 0.00 | -0.01 |
| 462 | 0.00 | 0.00  | 0.00 | 0.00 | 0.00 | 0.00  |
| 463 | 0.00 | 0.00  | 0.00 | 0.00 | 0.00 | 0.00  |
| 464 | 0.00 | 0.00  | 0.00 | 0.00 | 0.00 | -0.01 |
| 465 | 0.00 | 0.00  | 0.00 | 0.00 | 0.00 | -0.02 |
| 466 | 0.00 | 0.00  | 0.00 | 0.00 | 0.00 | 0.00  |
| 467 | 0.00 | 0.00  | 0.00 | 0.00 | 0.00 | 0.00  |
| 468 | 0.00 | 0.00  | 0.00 | 0.00 | 0.00 | 0.00  |
| 469 | 0.00 | 0.00  | 0.00 | 0.00 | 0.00 | 0.00  |
| 470 | 0.00 | 0.00  | 0.00 | 0.00 | 0.00 | 0.00  |
| 471 | 0.00 | 0.00  | 0.00 | 0.00 | 0.00 | -0.01 |
| 472 | 0.00 | 0.00  | 0.00 | 0.00 | 0.00 | 0.00  |
| 473 | 0.00 | 0.00  | 0.00 | 0.00 | 0.00 | -0.01 |
| 474 | 0.00 | 0.00  | 0.00 | 0.00 | 0.00 | -0.04 |
| 475 | 0.00 | -0.01 | 0.00 | 0.00 | 0.00 | -0.06 |
| 476 | 0.00 | 0.00  | 0.00 | 0.00 | 0.00 | -0.01 |
| 477 | 0.00 | 0.00  | 0.00 | 0.00 | 0.00 | -0.04 |
| 478 | 0.00 | -0.01 | 0.00 | 0.00 | 0.00 | -0.35 |
| 479 | 0.00 | -0.03 | 0.00 | 0.00 | 0.00 | -0.52 |
| 480 | 0.00 | -0.01 | 0.00 | 0.00 | 0.00 | -0.08 |
| 481 | 0.00 | -0.01 | 0.00 | 0.00 | 0.00 | -0.06 |
| 482 | 0.00 | -0.02 | 0.00 | 0.00 | 0.00 | -0.02 |
| 483 | 0.00 | -0.02 | 0.00 | 0.00 | 0.00 | -0.01 |
| 484 | 0.00 | -0.01 | 0.00 | 0.00 | 0.00 | -0.02 |
| 485 | 0.00 | -0.01 | 0.00 | 0.00 | 0.00 | 0.00  |
| 486 | 0.00 | -0.01 | 0.00 | 0.00 | 0.00 | 0.00  |
| 487 | 0.00 | 0.00  | 0.00 | 0.00 | 0.00 | 0.00  |
| 488 | 0.00 | 0.00  | 0.00 | 0.00 | 0.00 | 0.00  |
| 489 | 0.00 | 0.00  | 0.00 | 0.00 | 0.00 | 0.00  |
| 490 | 0.00 | 0.00  | 0.00 | 0.00 | 0.00 | 0.00  |
| 491 | 0.00 | 0.00  | 0.00 | 0.00 | 0.00 | 0.00  |
| 492 | 0.00 | 0.00  | 0.00 | 0.00 | 0.00 | 0.00  |
| 493 | 0.00 | 0.00  | 0.00 | 0.00 | 0.00 | 0.00  |
| 494 | 0.00 | 0.00  | 0.00 | 0.00 | 0.00 | 0.00  |
| 495 | 0.00 | 0.00  | 0.00 | 0.00 | 0.00 | 0.00  |

|     |      |      |      |      |      |      |
|-----|------|------|------|------|------|------|
| 496 | 0.00 | 0.00 | 0.00 | 0.00 | 0.00 | 0.00 |
| 497 | 0.00 | 0.00 | 0.00 | 0.00 | 0.00 | 0.00 |
| 498 | 0.00 | 0.00 | 0.00 | 0.00 | 0.00 | 0.00 |
| 499 | 0.00 | 0.00 | 0.00 | 0.00 | 0.00 | 0.00 |
| 500 | 0.00 | 0.00 | 0.00 | 0.00 | 0.00 | 0.00 |
| 501 | 0.00 | 0.00 | 0.00 | 0.00 | 0.00 | 0.00 |
| 502 | 0.00 | 0.00 | 0.00 | 0.00 | 0.00 | 0.00 |
| 503 | 0.00 | 0.00 | 0.00 | 0.00 | 0.00 | 0.00 |
| 504 | 0.00 | 0.00 | 0.00 | 0.00 | 0.00 | 0.00 |
| 505 | 0.00 | 0.00 | 0.00 | 0.00 | 0.00 | 0.00 |
| 506 | 0.00 | 0.00 | 0.00 | 0.00 | 0.00 | 0.00 |
| 507 | 0.00 | 0.00 | 0.00 | 0.00 | 0.00 | 0.00 |
| 508 | 0.00 | 0.00 | 0.00 | 0.00 | 0.00 | 0.00 |
| 509 | 0.00 | 0.00 | 0.00 | 0.00 | 0.00 | 0.00 |
| 510 | 0.00 | 0.00 | 0.00 | 0.00 | 0.00 | 0.00 |
| 511 | 0.00 | 0.00 | 0.00 | 0.00 | 0.00 | 0.00 |
| 512 | 0.00 | 0.00 | 0.00 | 0.00 | 0.00 | 0.00 |
| 513 | 0.00 | 0.00 | 0.00 | 0.00 | 0.00 | 0.00 |
| 514 | 0.00 | 0.00 | 0.00 | 0.00 | 0.00 | 0.00 |
| 515 | 0.00 | 0.00 | 0.00 | 0.00 | 0.00 | 0.00 |
| 516 | 0.00 | 0.00 | 0.00 | 0.00 | 0.00 | 0.00 |
| 517 | 0.00 | 0.00 | 0.00 | 0.00 | 0.00 | 0.00 |
| 518 | 0.00 | 0.00 | 0.00 | 0.00 | 0.00 | 0.00 |
| 519 | 0.00 | 0.00 | 0.00 | 0.00 | 0.00 | 0.00 |
| 520 | 0.00 | 0.00 | 0.00 | 0.00 | 0.00 | 0.00 |
| 521 | 0.00 | 0.00 | 0.00 | 0.00 | 0.00 | 0.00 |
| 522 | 0.00 | 0.00 | 0.00 | 0.00 | 0.00 | 0.00 |
| 523 | 0.00 | 0.00 | 0.00 | 0.00 | 0.00 | 0.00 |
| 524 | 0.00 | 0.00 | 0.00 | 0.00 | 0.00 | 0.00 |
| 525 | 0.00 | 0.00 | 0.00 | 0.00 | 0.00 | 0.00 |
| 526 | 0.00 | 0.00 | 0.00 | 0.00 | 0.00 | 0.00 |
| 527 | 0.00 | 0.00 | 0.00 | 0.00 | 0.00 | 0.00 |
| 528 | 0.00 | 0.00 | 0.00 | 0.00 | 0.00 | 0.00 |
| 529 | 0.00 | 0.00 | 0.00 | 0.00 | 0.00 | 0.00 |
| 530 | 0.00 | 0.00 | 0.00 | 0.00 | 0.00 | 0.00 |
| 531 | 0.00 | 0.00 | 0.00 | 0.00 | 0.00 | 0.00 |
| 532 | 0.00 | 0.00 | 0.00 | 0.00 | 0.00 | 0.00 |
| 533 | 0.00 | 0.00 | 0.00 | 0.00 | 0.00 | 0.00 |
| 534 | 0.00 | 0.00 | 0.00 | 0.00 | 0.00 | 0.00 |
| 535 | 0.00 | 0.00 | 0.00 | 0.00 | 0.00 | 0.00 |
| 536 | 0.00 | 0.00 | 0.00 | 0.00 | 0.00 | 0.00 |
| 537 | 0.00 | 0.00 | 0.00 | 0.00 | 0.00 | 0.00 |
| 538 | 0.00 | 0.00 | 0.00 | 0.00 | 0.00 | 0.00 |
| 539 | 0.00 | 0.00 | 0.00 | 0.00 | 0.00 | 0.00 |
| 540 | 0.00 | 0.00 | 0.00 | 0.00 | 0.00 | 0.00 |
| 541 | 0.00 | 0.00 | 0.00 | 0.00 | 0.00 | 0.00 |
| 542 | 0.00 | 0.00 | 0.00 | 0.00 | 0.00 | 0.00 |
| 543 | 0.00 | 0.00 | 0.00 | 0.00 | 0.00 | 0.00 |
| 544 | 0.00 | 0.00 | 0.00 | 0.00 | 0.00 | 0.00 |
| 545 | 0.00 | 0.00 | 0.00 | 0.00 | 0.00 | 0.00 |

|     |      |      |      |      |      |      |
|-----|------|------|------|------|------|------|
| 546 | 0.00 | 0.00 | 0.00 | 0.00 | 0.00 | 0.00 |
| 547 | 0.00 | 0.00 | 0.00 | 0.00 | 0.00 | 0.00 |
| 548 | 0.00 | 0.00 | 0.00 | 0.00 | 0.00 | 0.00 |
| 549 | 0.00 | 0.00 | 0.00 | 0.00 | 0.00 | 0.00 |
| 550 | 0.00 | 0.00 | 0.00 | 0.00 | 0.00 | 0.00 |
| 551 | 0.00 | 0.00 | 0.00 | 0.00 | 0.00 | 0.00 |
| 552 | 0.00 | 0.00 | 0.00 | 0.00 | 0.00 | 0.00 |
| 553 | 0.00 | 0.00 | 0.00 | 0.00 | 0.00 | 0.00 |
| 554 | 0.00 | 0.00 | 0.00 | 0.00 | 0.00 | 0.00 |
| 555 | 0.00 | 0.00 | 0.00 | 0.00 | 0.00 | 0.00 |
| 556 | 0.00 | 0.00 | 0.00 | 0.00 | 0.00 | 0.00 |
| 557 | 0.00 | 0.00 | 0.00 | 0.00 | 0.00 | 0.00 |
| 558 | 0.00 | 0.00 | 0.00 | 0.00 | 0.00 | 0.00 |
| 559 | 0.00 | 0.00 | 0.00 | 0.00 | 0.00 | 0.00 |
| 560 | 0.00 | 0.00 | 0.00 | 0.00 | 0.00 | 0.00 |
| 561 | 0.00 | 0.00 | 0.00 | 0.00 | 0.00 | 0.00 |
| 562 | 0.00 | 0.00 | 0.00 | 0.00 | 0.00 | 0.00 |
| 563 | 0.00 | 0.00 | 0.00 | 0.00 | 0.00 | 0.00 |
| 564 | 0.00 | 0.00 | 0.00 | 0.00 | 0.00 | 0.00 |
| 565 | 0.00 | 0.00 | 0.00 | 0.00 | 0.00 | 0.00 |
| 566 | 0.00 | 0.00 | 0.00 | 0.00 | 0.00 | 0.00 |
| 567 | 0.00 | 0.00 | 0.00 | 0.00 | 0.00 | 0.00 |
| 568 | 0.00 | 0.00 | 0.00 | 0.00 | 0.00 | 0.00 |
| 569 | 0.00 | 0.00 | 0.00 | 0.00 | 0.00 | 0.00 |
| 570 | 0.00 | 0.00 | 0.00 | 0.00 | 0.00 | 0.00 |
| 571 | 0.00 | 0.00 | 0.00 | 0.00 | 0.00 | 0.00 |
| 572 | 0.00 | 0.00 | 0.00 | 0.00 | 0.00 | 0.00 |
| 573 | 0.00 | 0.00 | 0.00 | 0.00 | 0.00 | 0.00 |
| 574 | 0.00 | 0.00 | 0.00 | 0.00 | 0.00 | 0.00 |
| 575 | 0.00 | 0.00 | 0.00 | 0.00 | 0.00 | 0.00 |
| 576 | 0.00 | 0.00 | 0.00 | 0.00 | 0.00 | 0.00 |
| 577 | 0.00 | 0.00 | 0.00 | 0.00 | 0.00 | 0.00 |
| 578 | 0.00 | 0.00 | 0.00 | 0.00 | 0.00 | 0.00 |
| 579 | 0.00 | 0.00 | 0.00 | 0.00 | 0.00 | 0.00 |
| 580 | 0.00 | 0.00 | 0.00 | 0.00 | 0.00 | 0.00 |
| 581 | 0.00 | 0.00 | 0.00 | 0.00 | 0.00 | 0.00 |
| 582 | 0.00 | 0.00 | 0.00 | 0.00 | 0.00 | 0.00 |
| 583 | 0.00 | 0.00 | 0.00 | 0.00 | 0.00 | 0.00 |
| 584 | 0.00 | 0.00 | 0.00 | 0.00 | 0.00 | 0.00 |
| 585 | 0.00 | 0.00 | 0.00 | 0.00 | 0.00 | 0.00 |

---
